# Supplementary material for: Epigenetic silencing of CREB3L1 by DNA methylation is associated with high-grade metastatic breast cancers with poor prognosis and is prevalent in triple negative breast cancers
Source: Breast Cancer Res. 2016 Jan 25;18:12. doi: 10.1186/s13058-016-0672-x (PMC4727399; doi:10.1186/s13058-016-0672-x)
Supplement: Additional file 5: Table S2. — Site-specific methylation data for a panel of 40 breast cancer and 4 non-tumorigenic breast cell lines. (PDF 58 kb) [file 13058_2016_672_MOESM5_ESM.pdf]

Table S2. Site-specific methylation data for panel of 40 breast cancer and normal breast cell lines.

[illegible]

|  |                  |
|--|------------------|
|  | = not determined |
|--|------------------|

0 = not methylated

1 = somewhat methylated

2 = predominantly methylated

# - the number of distinct methylation sites, either somewhat or predominantly methylated, over the entire region analysed for that cell line.

Score - the weighted cumulative methylation that only includes data from sites -429 to +259. Sites scored as somewhat (1) and predominantly (2) methylated are given a value of 0.5 and 1 respectively.

% methylation - an estimate of level of methylation observed that only includes data from sites -429 to +259, analyzed for all cell lines. % methylation = Score/(60 CpG sites total) \*100.

Frequency (%) - the percent of cell lines showing methylation at that specific site; Frequency (%) = # methylated/44\*100
