# Supplementary material for: Epigenetic silencing of CREB3L1 by DNA methylation is associated with high-grade metastatic breast cancers with poor prognosis and is prevalent in triple negative breast cancers
Source: Breast Cancer Res. 2016 Jan 25;18:12. doi: 10.1186/s13058-016-0672-x (PMC4727399; doi:10.1186/s13058-016-0672-x)
Supplement: Additional file 7: Table S3. — Site-specific methylation data for the 35 breast tumor samples that contained methylated sites. (PDF 46 kb) [file 13058_2016_672_MOESM7_ESM.pdf]

Table S3. Site-specific methylation data for 35 human breast tumor samples.

[illegible]

|  |                  |
|--|------------------|
|  | = not determined |
|--|------------------|

0 = not methylated

0 = not methylated  
1 = somewhat methylated

2 = predominantly methylated

# - the number of distinct methylation sites, either somewhat or predominantly methylated, over the entire region analysed for that tumor sample.

Score = the weighted cumulative methylation that only includes data from sites -15 to +238, where all data is available for all samples. Sites scored as somewhat (1) and predominantly (2) methylated are given a value of 0.5 and 1 respectively. Note this excludes site 259, since data was not available for all samples for this site.

% methylation - an estimate of level of methylation observed that only includes data from sites -15 to +238, where all data is available for all samples. % methylation = Score/(23 CpG sites total) \*100.

Frequency (%) - the percent of tumors showing methylation at that specific site; Frequency (%) = # methylated/(# determined) x 100
