# Supplementary material for: Epigenetic silencing of CREB3L1 by DNA methylation is associated with high-grade metastatic breast cancers with poor prognosis and is prevalent in triple negative breast cancers
Source: Springer Nature journal article supplement (doi:10.1186/s13058-016-0672-x), 2016-01-25
Supplement: MOESM3 [file 9781636]

Fig. S2. Ward *et al.*

#14 = cg24825027  
 ttcgtgcaggctttaagtataaggctggaaggatggaatagctccctcatcaatttacgg -715

#1 = cg12256550  
 gacagtggttggtgaagccttaaaatgccaatggtccaggaacactgttatcgggtccag -655

gactattggtgctttaagccccaccttgagcattcagagaagagagattactaagacga -595

#4 = cg24644201  
 agttgcagatgtctcttttaaaaaaggagagaggattcctcgagccacgccctcttctcat -535

#6 = cg25626312 #5 = cg20981182  
 taatattaaattattgtgaatattgatgtgggggcgtggcgccttgccagctgggctag -475

TSS (-451)  
 ccaqccaqqggttcccggtttcacagagaggaaagtgcagaagacgtgcggagggagac -415

#7 = cg07700369  
 gcagagacagaggagagggccggcagccaccagctctcgggggagcacttagctcccccgc -355

cccggctcccaccctgtccggggggctcctgaagccctcagccccaacccggggctcccc -295

atggaagccagctgtgccccaggaggagcaggaggaggtggagtcggctgaatgcccacg -235

gtgcgcccggggcccctgagcccatcccgctcctagccgctgcctaaggcccccggcgg -175

cccccggccccccacccgggggccggcgcctccgtccgcccctcccccggggcttcgcc -115

#8 = cg03044069  
 ccggacctgcccccgcccgtttgccagcgctcaggcaggagctctggactgggcggcgcc -55

5' UTR Start site (coding)  
 gcgccctggagtgaggaagcccagtggaaggggtcccgggagccggctgcgATGGAC 6

GCCGTCTTGGAACCCCTTCCCGGCCGACAGGCTGTTCCCCCGGATCCAGCTTCTGGACTTG 66

exon 1 intron 1  
 GGGGATCTGAACGAGTCGGACTTCCCTCAACAATGCGGTAAGATGAAGGGTCTCCGTTCCT 126

GTTCCACCCCTCGGCACCCGTCCTCGCGGCGCGCCTGGGCCCTAGAAGGACCCGACTAC 186

ACATCACTGGGCAGGAGCCGGGGAGAGGGTTCAGCGCAGGGTCTCCAGGAGCGACATGTG 246

#2 = cg15917625  
 TTTGGAGCTAAGCGCCCCTCCTGGGGGCTCAATCTTTGAATACACTGGCCTCCACCTTCT 306

AGGGGAAGGGGCCATCGAGGTATCGGGTCGTCGATCCTCGGATCTGAGCTCAAGAGA 366

CACCAATCCCGCCCTCCACCCACGTCTTCTAGCCGTCCCCAACCCACCCAGGTTCCAGG 426

ACCAGACTGGGCGCAAAGTGGCAGCGCCCTTTCCTGCGCCTCCCTTGGGGCTTCGGTGGC 486

TCATAGGCTGGATCTCCGCTGGGGGGCGCACCGGGGAACGTTCAGAGGGCCTGAGACCCG 546

#3 = cg06859463  
 ACCCCTCGGGGAAGCCAGGCCAGAAATTCAGGGTGCTACCCTGGCAGCCCCAGGGAAT 606
