# Supplementary material for: Epigenetic silencing of CREB3L1 by DNA methylation is associated with high-grade metastatic breast cancers with poor prognosis and is prevalent in triple negative breast cancers
Source: Springer Nature journal article supplement (doi:10.1186/s13058-016-0672-x), 2016-01-25

Fig. S4. Ward *et al.*

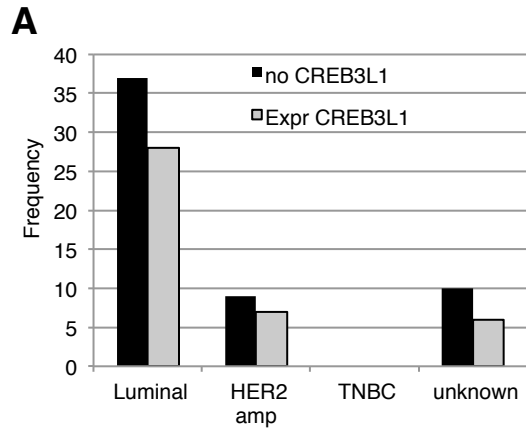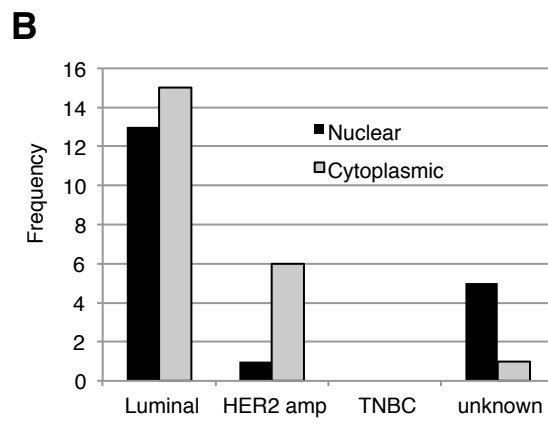

Supplement: MOESM6 [file 9781636]
