# Supplementary material for: Epigenetic silencing of CREB3L1 by DNA methylation is associated with high-grade metastatic breast cancers with poor prognosis and is prevalent in triple negative breast cancers
Source: Springer Nature journal article supplement (doi:10.1186/s13058-016-0672-x), 2016-01-25
Supplement: MOESM8 [file 9781636]

Table S4. Probe information used in TCGA to analyze CREB3L1 gene methylation in human breast tumor samples.

| #  | IlmnID-probe set | Methylated               | Location        | Feature   | Source Sequence                                     | Strand |
|----|------------------|--------------------------|-----------------|-----------|-----------------------------------------------------|--------|
| 14 | cg24825027       | variably                 | (-772)-(-723)   | promoter  | CGTGCAGGCTTTAGTATAAGGCTGGAAGGATGGAATAGCTCCCTCATCA   | F      |
| 1  | cg12256550       | variably                 | (-717)-(-668)   | promoter  | CGGGACAGTGGTTGGTGAAGCCTTAAATGCCAATGTTCCAGGAACACTG   | F      |
| 4  | cg24644201       | variably                 | (-597)-(-548)   | promoter  | GTGGCTCGAGGAATCCTCTCTCCTTTTTAAAGAGACATCTGCAACTTCG   | R      |
| 6  | cg25626312       | variably                 | (-507)-(-458)   | promoter  | CGGGAACCCCTGGCTGGCTAGCCCAGCTGGCCAAGGCGCCACGCCCCAC   | R      |
| 5  | cg20981182       | variably                 | (-495)-(-446)   | promoter  | TCTCTGTGAAACCGGGAACCCCTGGCTGGCTAGCCCAGCTGGCCAAGGCG  | R      |
| 7  | cg07700369       | variably                 | (-395)-(-346)   | 5' UTR    | GGAGCCGGGGCGGGGAGCTAAGTGTCTCCCCGAGACTGGGTGGCTGCCG   | R      |
| 8  | cg03044069       | variably                 | (-113)-(-64)    | 5' UTR    | AGTCCAGAGCTCTGCCTGAGCGCTGGCAAACGGGCGGGGGCAGGTCCG    | R      |
| 2  | cg15917625       | variably                 | 238-287         | intron 1  | ATTCAAAGATTGAGCCCCAGGAGGGGCGCTTAGCTCCAACACATGTCTG   | R      |
| 3  | cg06859463       | variably                 | 553-602         | intron 1  | CGGGGAAGCCAGGCCAGAAATTTTCAGGGTGTACCCTGGCAGCCCCAGG   | F      |
| 15 | cg25963429       | variably                 | 1700-1749       | intron 1  | CGGCCGAGTTCATTGAGAAGAAAGCCCAACTCAGAGCTGCCAAGGGCCGA  | R      |
| 17 | cg16012690       | variably                 | 15146-15195     | intron 1  | AGGGCTGGGATTAGCTGTGTCTGGCACCTCCGAGGGCACAGCAGCCCACG  | R      |
| 18 | cg09709565       | variably                 | 16620-16669     | intron 1  | CGCCCCCTAGGCACAGCAGTACTCAGACTGAAGGCCCTTCAGCTTGAAA   | F      |
| 10 | cg02364610       | variably                 | 17373-17422     | intron 1  | CGGCCAGGCCATTTCTGCCTCGGCCCCAGACGCAGAAGGGGTCCCATGCA  | F      |
| 11 | cg14547067       | variably                 | 17491-17540     | intron 1  | GCAGCAGCCGGTGGCGGCGTGGAGGGCACCGGAGGAGTGCAGGGCTCGCG  | R      |
| 13 | cg03131732       | variably                 | 17812-17861     | intron 1  | AGACTTTTTCTATAGTCGTGCCAATATAAGCTCCTTCTCGGCTGTCACG   | R      |
| 12 | cg09896120       | variably                 | 17916-17963     | intron 1  | AGGGTTCTGCAGGGGTGAGCGTCTACAGGGTGCCTTTCAGGCAACG      | R      |
| 19 | cg20068058       | variably                 | 18148-18197     | intron 1  | GTCTGAGGTCTCCAAAATGGGCTTTCAGGGATGGGGCCAAGTGGATGCG   | F      |
| 20 | cg22902089       | variably                 | 18560-18609     | intron 1  | CGCCCACCGTCCACCCAGCACCTGAAGAAGCCCGGCGCAAAGAGGACCTG  | F      |
| 16 | cg07008193       | variably                 | 18816-18865     | intron 1  | CGGATCTGGGCTGGACTCCCTGAAGGCCTTGGCTCAGGCAGATGACCCAG  | R      |
| 9  | cg21690489       | variably                 | 30549-30598     | intron 3  | CGCTCCCATCTAGGGATTTTAAGATGCTGCTCATCCTGTGGAATCCCAGG  | R      |
|    |                  |                          |                 |           |                                                     |        |
|    | cg00352031       | no                       | (-1302)-(-1253) | 5' UTR    | CGGTATACACCCACAGGGCATCATGTGCTCACCTCCACTGTTCCAGTCT   | R      |
|    | cg06588284       | no                       | 6015-6064       | intron 1  | TGCCAGGGTAACCCAGATGAAGAAAACACACTTGACCCTCCAGTCAATCG  | R      |
|    | cg06884875       | no                       | 13340-13389     | intron 1  | CGGACCTGGTTCTAATCCTGGTTCTGCTATACACTGTGCAGGCTTTGGAC  | R      |
|    | cg16795564       | no                       | 3393-3442       | intron 1  | CGGGTGTGCTGGGCAAACATCCTTGCAGCTTCTGCTGCTCCCCTCTGAG   | R      |
|    | cg18857647       | no                       | 21524-21573     | intron 1  | CGCTCACCATTGTTATCTGCAAGGGTGAAGTCTCAGGATGGGATCAAAAAC | R      |
|    | cg04424721       | yes; both tumor & normal | 42751-42800     | intron 10 | TTTCTCTGGAATGGGAAGCTCCAGGAGGCAGGGGCACGAGGCGGATCCG   | F      |

# - number assigned to each region.

IlmnID-probe set - TCGA probe name.

Methylated - if region is methylated in normal and/or tumor breast tissue.

Location - location of the 50 bp probe region within the CREB3L1 gene, relative to the translational start site.

Feature - location of the 50 bp probe region with regards to the gene structure.

Source Sequence - sequence of the 50 bp region analyzed.

Strand - F = forward strand; R = reverse strand, to which the source sequence corresponds.
